# Supplementary material
Source: bioRxiv or medRxiv preprint supplement (https://www.medrxiv.org/highwire/filestream/80022/field_highwire_adjunct_files/5/2020.05.05.20092098-6.pdf)
Supplement: Supplementary file [file 2020.05.05.20092098-6.pdf]

| Parameter                                                                                                      | Prior distribution / fixed value                                                                                                                                                                                                 | Prior bounds         |
|----------------------------------------------------------------------------------------------------------------|----------------------------------------------------------------------------------------------------------------------------------------------------------------------------------------------------------------------------------|----------------------|
| <p>Reproductive number during time interval <math>t</math></p> <p><math>R_t</math></p>                         | <p><math>R_t \sim Uniform(0.1, 6.0)</math></p> 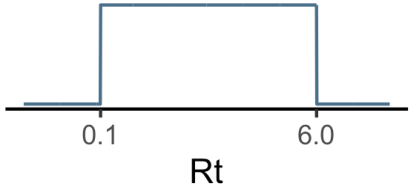                                                                                                | <p>[0.1, 6]</p>      |
| <p>Coefficient of variation in the reproductive number</p> <p><math>\psi</math></p>                            | <p><math>\psi \sim Lognormal(2.7, 0.9)</math></p>                                                                                              | <p>[1, 100]</p>      |
| <p>Probability of detecting a reported case during time interval <math>t</math></p> <p><math>\rho_t</math></p> | <p><math>\rho_t \sim Beta(1, 1)</math></p>                                                                                                    | <p>-</p>             |
| <p>The number of infected individuals at the start of the analysis</p> <p><math>N_0</math></p>                 | <p><math>N_0 \sim Uniform(1, 200)</math></p>                                                                                                 | <p>-</p>             |
| <p>Weibull distribution parameters for Generation time <math>\tau_j</math></p> <p><math>\alpha, s</math></p>   | <p><math>\alpha = 2.860</math><br/> <math>s = 0.015</math><br/> <math>E(\tau_j) = 5</math> days<br/> <math>SD(\tau_j) = 1.9</math> days</p>  | <p>Not estimated</p> |
